# Supplementary material for: Limited consensus of marine viral diversity observed across techniques
Source: Research Square preprint supplement (doi:10.21203/rs.3.rs-5482008/v1), 2024-12-18
Supplement: Supplementary file 1 [file d8d18baec0d070555d0a231c.docx]

**Supplementary Material for**

**Limited consensus of marine viral diversity observed across techniques**

Marina Vila-Nistal1,2, Francisco Martinez-Hernandez1,2, Monica Lluesma-Gomez1,2, Oscar Fornas3,4, Simon Roux5, Manuel Martinez-Garcia*1,2

1Department of Physiology, Genetics, and Microbiology, University of Alicante, Carretera San Vicente del Raspeig, San Vicente del Raspeig, Alicante, 03690, Spain

2MultidisciplinaryInstitute for Environmental Studies (IMEM), University of Alicante, Carretera San Vicente del Raspeig, San Vicente del Raspeig, Alicante, 03690, Spain

3Centre for Genomic Regulation (CRG), The Barcelona Institute for Science and Technology (BIST), Carrer del Doctor Aiguader, 88, PRBB Building, Barcelona, 08003, Spain

4Universitat Pompeu Fabra (UPF), Carrer del Doctor Aiguader, 88, PRBB Building, Barcelona, 08003, Spain

5Joint Genome Institute. Department of Energy of EEUU, California, EEUU

*Correspondence to: [m.martinez@ua.es](mailto:m.martinez@ua.es)

phone +34 965902161

The authors declare no competing interests.

**This supplementary material contains five supplementary figures and two supplementary tables**


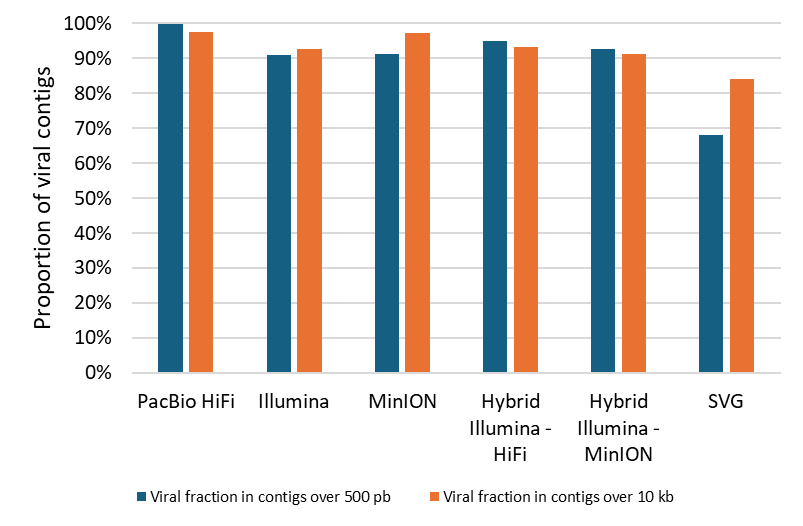


**Supplementary Figure 1**. Proportion of contigs identified as viruses (see Methods) recovered by each methodology, relative to the total of recovered contigs over 500 pb (blue) or over 10 kb (orange).


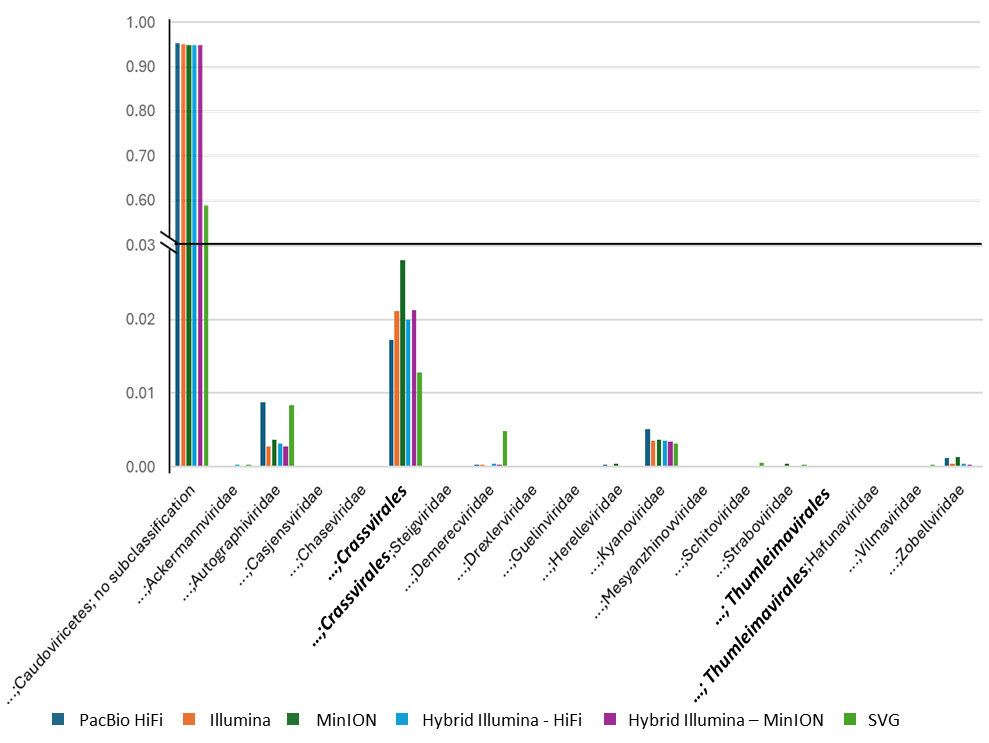


Relative frequency

**Supplementary Figure 2**. Taxonomic breakdown of the viral contigs recovered from each method, considering only those inside the Caudoviricetes class as they constitute over the 80% of the contigs and present the true differences between methods. Orders are marked in boldface type to distinguish them from the families, most of which currently remain unassigned to an order.


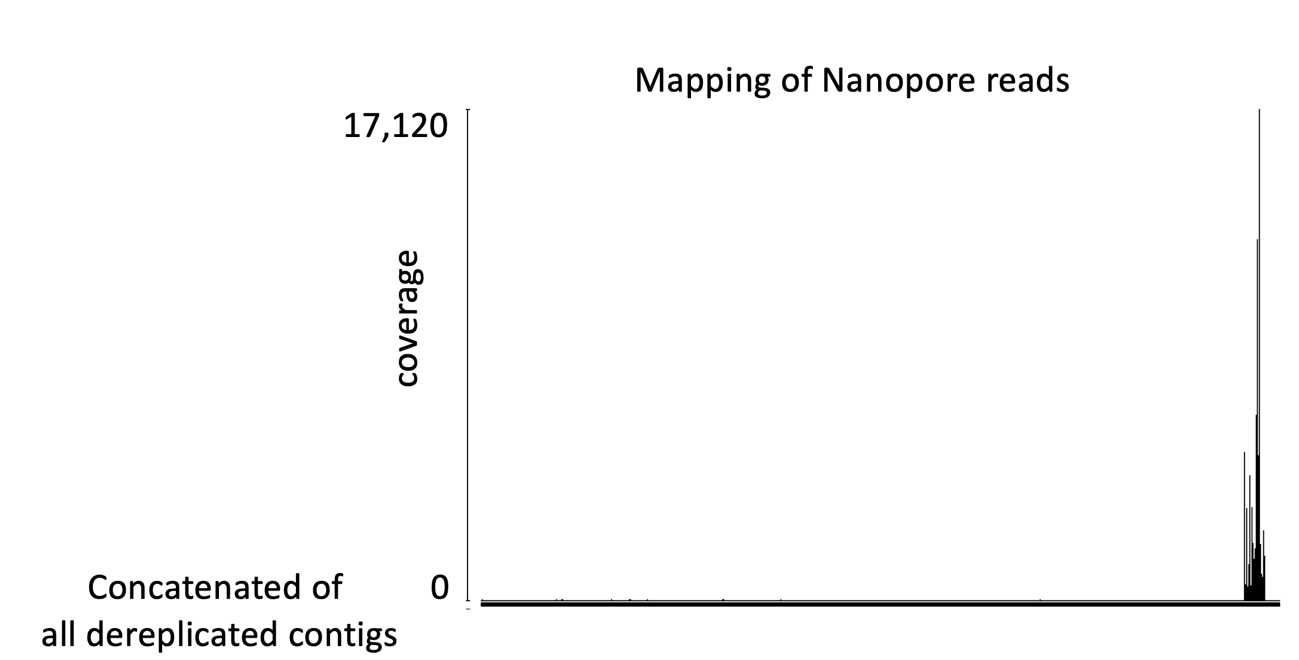


**Supplementary Figure 3**. Read mapping of Nanopore data (MinION platform) against all concatenated, dereplicated viral contigs (≥10 kb) obtained from all methods (X axis). Mapping was performed with Geneious bioinformatic program using the Geneious mapper with custom sensitivity employing a minimum read overlap of 500 bp and 80% of nucleotide identity.


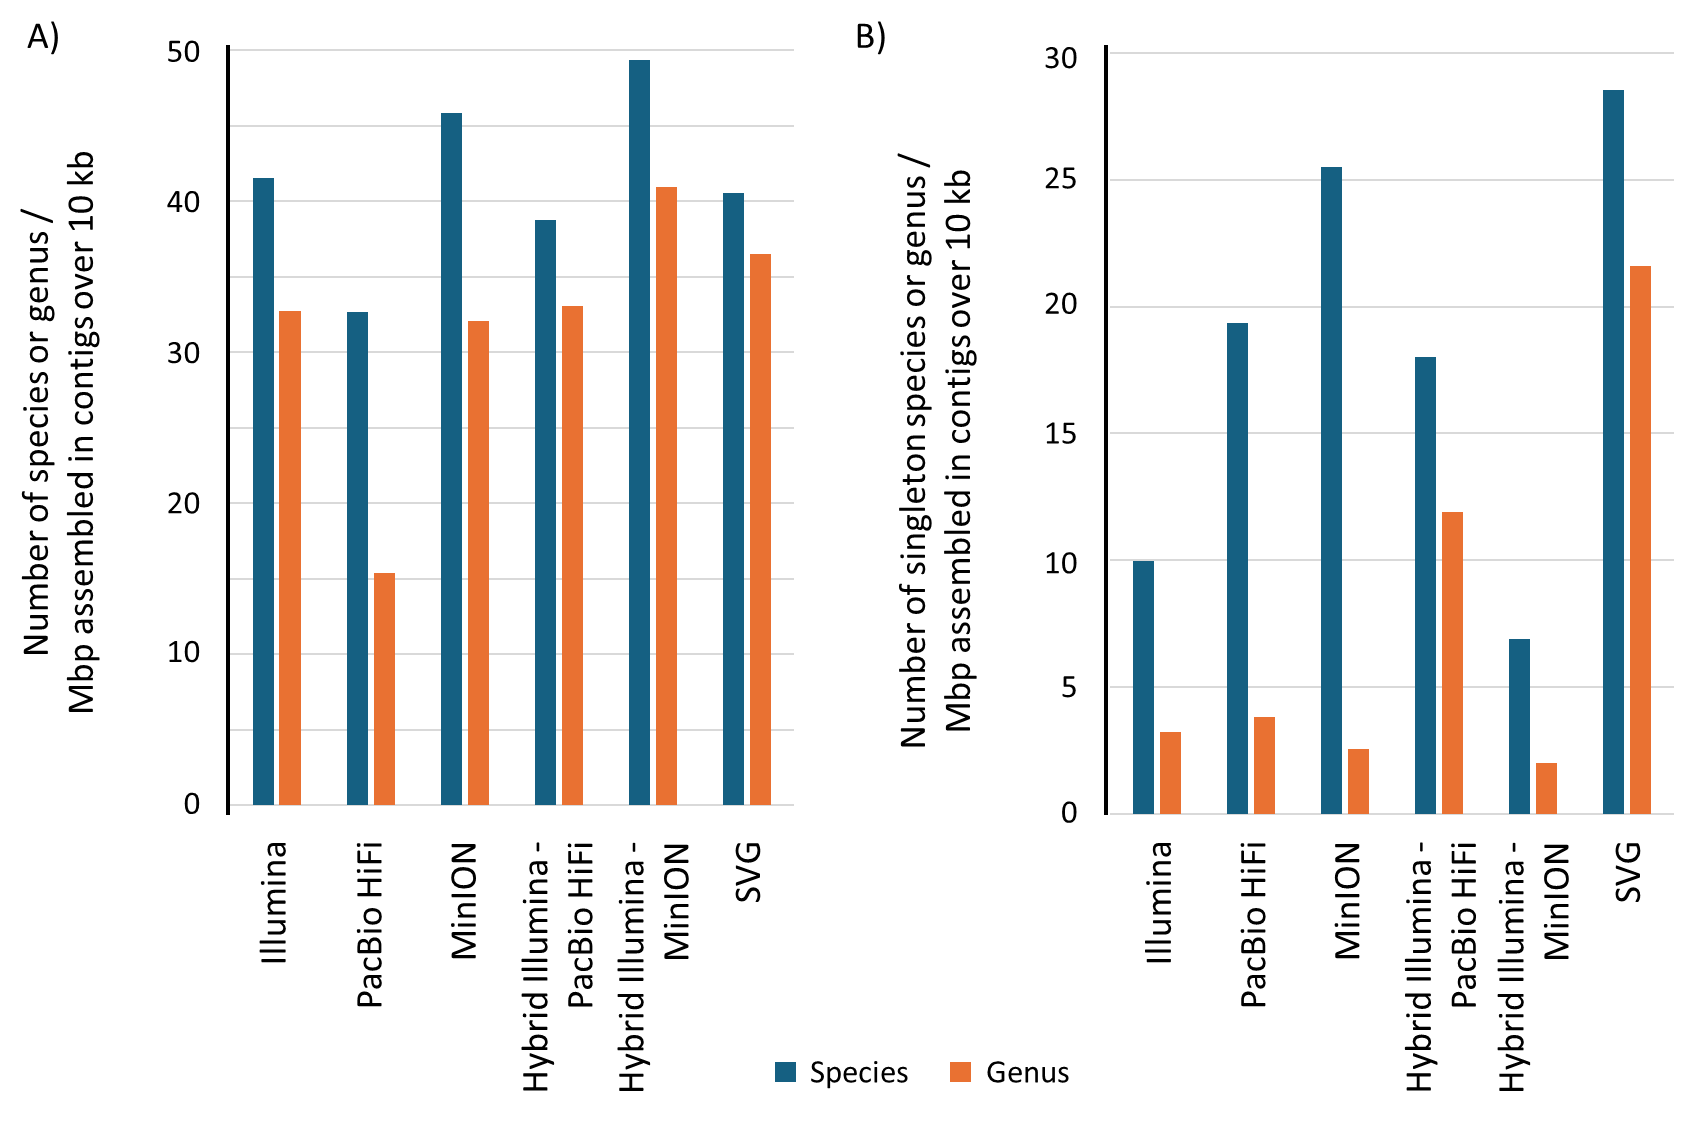


**Supplementary Figure 4**. Proportion of species (blue) and genera (orange) recovered by each method, normalized by the number of base pairs (Mbp) assembled in contigs over 10 kb. A) All species and genera detected by each method. B) Species and genera with only one recovered member (singletons) detected by each method.


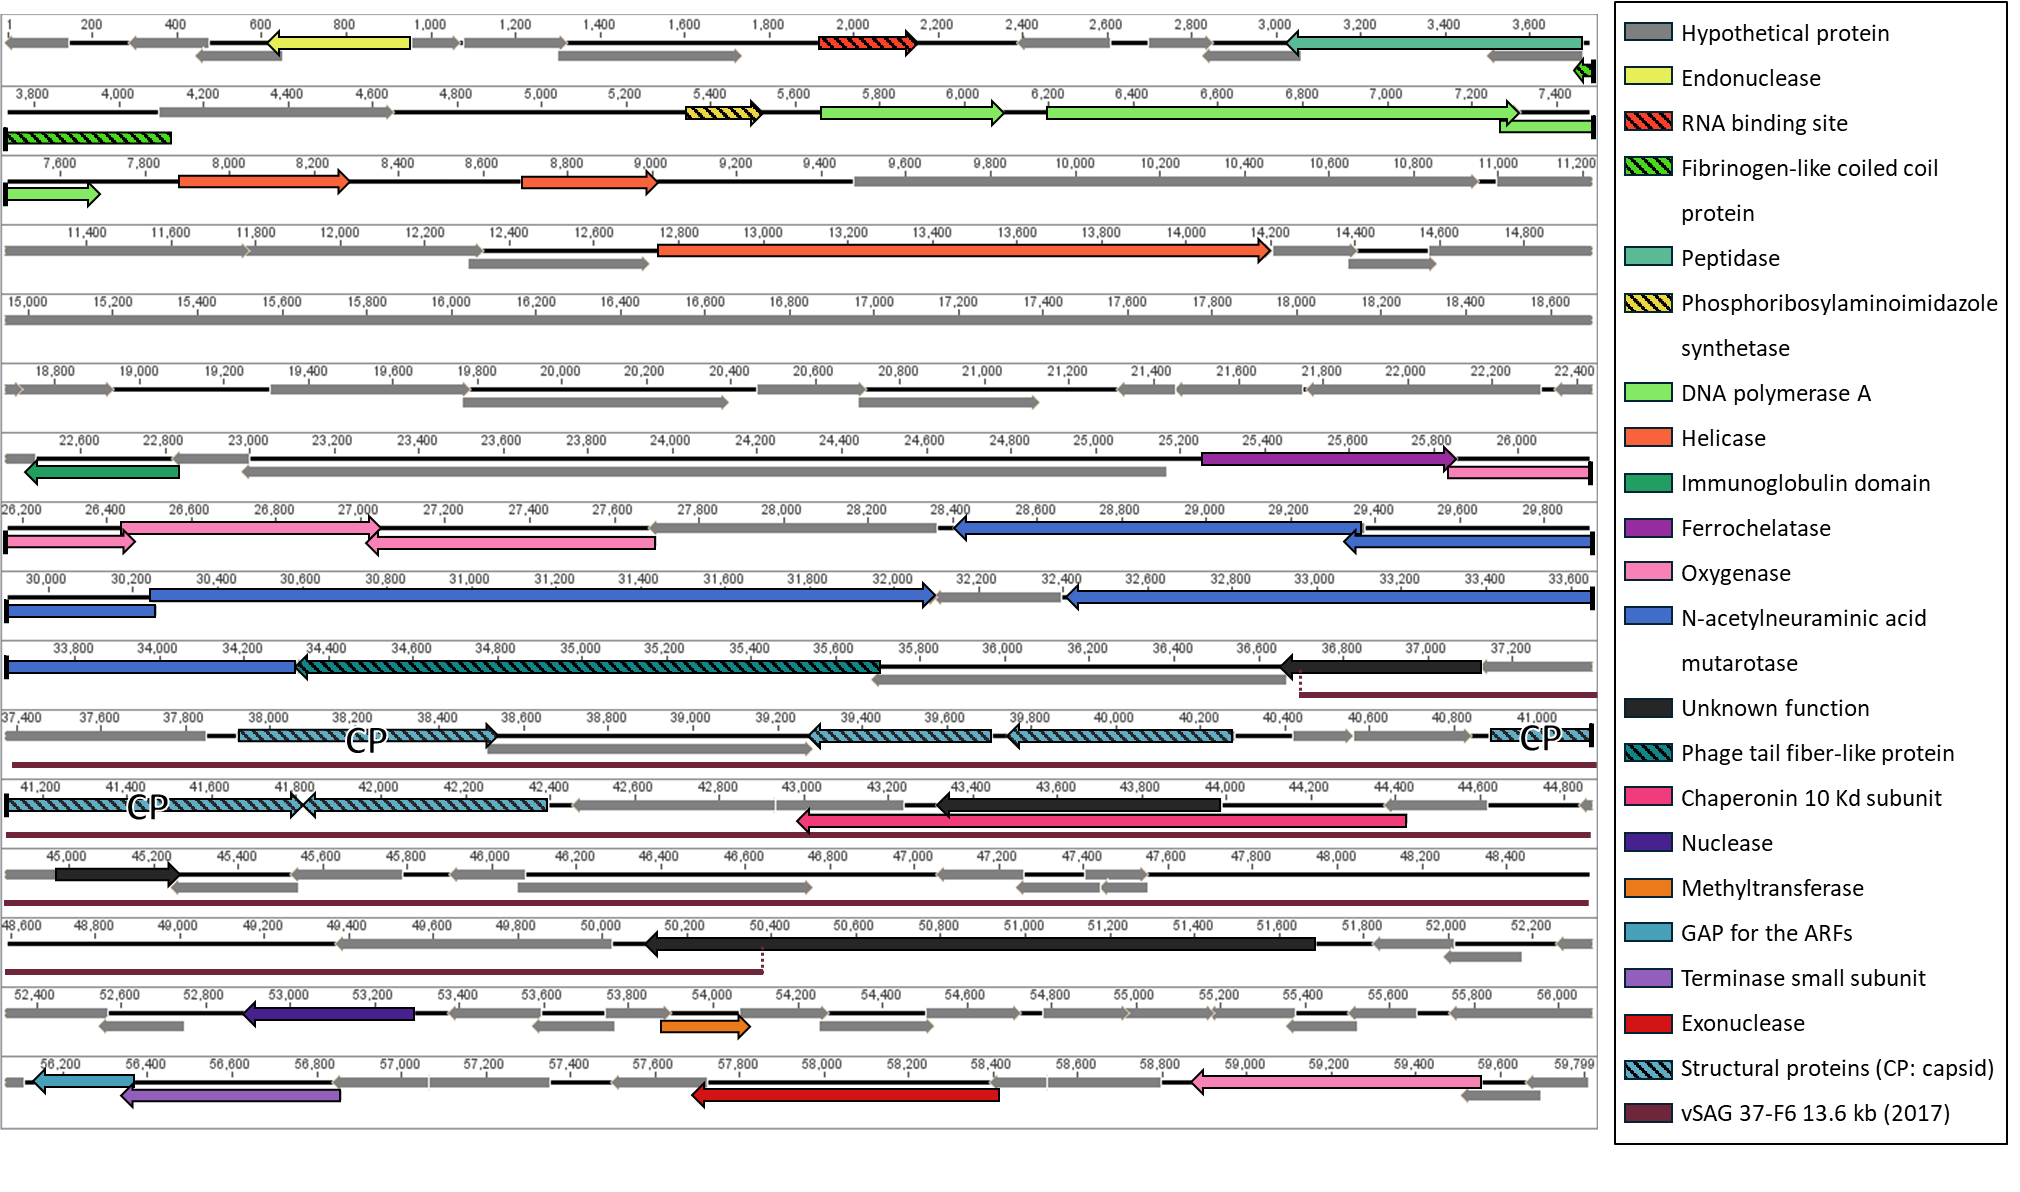
**Supplementary Figure 5**. Annotation of the vSAG 37-F6 complete genome and alignment with the fraction corresponding to the partial 13.589 pb genome recovered by Francisco Martinez-Hernandez et al. (2017). ARFs: ADP ribosylation factors , CP: capsid protein, GAP: GTPase-activating protein

**Supplementary Table 1.** Sequencing process and posterior treatment followed for each sample. MV: metavirome; SV: single virus

| **Sample** | **Library** | **Sequencing platform – company (country)** | **Read treatment** | **Assembly** |
| --- | --- | --- | --- | --- |
| MV | Illumina DNA Prep – University of Alicante (Spain) | Illumina HiseqX 150PE (150 x 2bp) – Macrogen (Republic of Korea) | Fastp v.0.23.0 | SPAdes (v. 3.13.0) (Nurk et al., 2013) with the options: --meta -k 21,33,55,77,99,127 --only-assembler. |
| MV | VirION2 protocol (Warwick-Dugdale et al., 2019) –University of Exeter (UK) | MinION Oxford Nanopore Technologies – Exeter University (UK) | Basecalling performed using Guppy (v.5) (Wick et al., 2019) with the superaccuracy mode | Flye (v.2.9) (Kolmogorov et al., 2019) with the options --meta --nano-raw |
| MV | PacBio Multiplexed 6-10kb with Blue Pippin Size Selection – JGI (USA) | HiFi PacBio Sequel II Multiplexed 6-10kb Ultra-Low Input – JGI (USA) | JGI QC pipeline to remove artifacts (Clum et al., 2021) | Flye (v.2.9) with the options --meta --pacbio-hifi  The resulting assembly was polished with racon (v.1.4.13) (Vaser et al., 2017) with the options -u -t 36. |
| SV | Illumina Nextera – JGI (USA) | Illumina NovaSeq S4 PE – JGI (USA) | JGI QC Pipeline to remove artifacts (Clum et al., 2021) | SPAdes (v. 3.15.3) (Nurk et al., 2013) with the options: -k 21,33,55,77,99,127 --only-assembler. |

**Supplementary Table 2.** Proportion of the contigs over 10 kb recovered by each sequencing methodology classified according to the Uncultivated Virus Genome standards (Roux *et al.*, 2016). SVG: single virus genomics

| **Sequencing method** | **Genome-fragment** | **High-quality** |
| --- | --- | --- |
| PacBio HiFi | 91.89% | 8.11% |
| Illumina | 97.57% | 2.43% |
| Hybrid Illumina - PacBio HiFi | 91.62% | 8.38% |
| Hybrid Illumina - MinION | 98.26% | 1.74% |
| MinION | 95.53% | 4.47% |
| SVG | 99.59% | 0.41% |

**Supplementary Table 3.** Classification of viral assembled datasets (contigs ≥500 bp) using geNomad program

| **Taxonomy** | **Pacbio HiFi** | **Illumina** | **MinION** | **IlluHiFi** | **Illumina-MinION** | **SVG** |
| --- | --- | --- | --- | --- | --- | --- |
| *Unclassified* | 4.9 | 39.6 | 13.8 | 43.4 | 42.5 | 16.4 |
| Classified viruses | 95.1 | 60.4 | 86.2 | 56.6 | 57.5 | 83.6 |
| Unclassified viruses | 0.3 | 0.2 | 0.2 | 0.2 | 0.2 | 0.9 |
| Caudoviricetes | 93.8 | 59.2 | 85.0 | 55.4 | 56.2 | 69.5 |
| Fuselloviridae | <0.1 | <0.1 | 0.0 | <0.1 | <0.1 | 0.0 |
| Monodnaviria | <0.1 | 0.2 | <0.1 | 0.2 | 0.1 | 0.2 |
| Riboviria | 0.0 | <0.1 | 0.0 | <0.1 | <0.1 | 0.0 |
| Nucleocytoviricota | 0.9 | 0.7 | 0.9 | 0.8 | 0.8 | 13.1 |
| Preplasmiviricota | 0.1 | 0.1 | 0.1 | 0.1 | 0.1 | 0.0 |
